# Supplementary material
Source: publisher site journal article supplement (https://www.dovepress.com/article/444625)
Supplement: Supplementary file 1 [file get_supplementary_file.php]

**Supplementary Material**

**Supplementary Table S1** Raw data of the cytotoxicity of CYN on RD cells

| Groups | | OD value | | | | | Cell survival rate (%) | | | | | | | cCC50 (mg/mL) |
| --- | --- | --- | --- | --- | --- | --- | --- | --- | --- | --- | --- | --- | --- | --- |
| 1 | 2 | 3 | 4 | 5 | 1 | 2 | 3 | 4 | 5 | mean | SD |
| CYN | 20.0 mg/mL | 0.166 | 0.166 | 0.131 | 0.265 | 0.252 | 2.72 | 2.71 | -0.86 | 12.66 | 11.31 | 5.71 | 5.93 | 7.96 |
| 10.0 mg/mL | 0.539 | 0.297 | 0.214 | 0.338 | 0.497 | 40.22 | 15.81 | 7.54 | 20.01 | 35.93 | 23.90 | 13.78 |  |
| 5.00 mg/mL | 1.188 | 1.218 | 1.113 | 1.168 | 1.149 | 105.41 | 108.51 | 97.95 | 103.48 | 101.57 | 103.39 | 3.97 |  |
| 2.50 mg/mL | 1.042 | 1.131 | 1.142 | 1.119 | 1.050 | 90.81 | 99.72 | 100.87 | 98.47 | 91.57 | 96.29 | 4.74 |  |
| 1.25 mg/mL | 1.115 | 1.0952 | 1.032 | 1.111 | 1.189 | 98.14 | 96.12 | 89.73 | 97.71 | 105.56 | 97.45 | 5.65 |  |
| aCC |  | 1.079 | 1.106 | 1.045 | 1.193 | 1.246 |  |  |  |  |  |  |  |  |
| bBlank |  | 0.141 | 0.143 | 0.128 | 0.147 | 0.137 |  |  |  |  |  |  |  |  |

aCC presented the wells only containing uninfected cells.

bBlank was the wells with no cell.

cThe CC50 was calculated by the following formulas:

Distance rate = (50% − IR <50% ) / (IR >50% − IR <50%)

CC50 = 10∧{log (drug concentration with IR <50%) − distance rate × log (dilution ratio)}

**Supplementary Table S2** Raw data of the cytotoxicity of Ribavirin on RD cells

| Groups | | OD value | | | | | Cell survival rate (%) | | | | | | | cCC50 (mg/mL) |
| --- | --- | --- | --- | --- | --- | --- | --- | --- | --- | --- | --- | --- | --- | --- |
| 1 | 2 | 3 | 4 | 5 | 1 | 2 | 3 | 4 | 5 | mean | SD |
| Ribavirin | 4.00 mg/mL | 0.167 | 0.163 | 0.170 | 0.170 | 0.179 | 4.20 | 3.71 | 4.57 | 4.57 | 5.68 | 4.55 | 0.72 | 2.43 |
| 2.00 mg/mL | 0.668 | 0.678 | 0.680 | 0.693 | 0.703 | 65.77 | 66.99 | 67.24 | 68.84 | 70.07 | 67.78 | 1.68 |  |
| 1.00 mg/mL | 0.876 | 0.887 | 0.911 | 0.939 | 0.932 | 91.32 | 92.68 | 95.63 | 99.07 | 98.21 | 95.38 | 3.37 |  |
| 0.50 mg/mL | 0.983 | 0.982 | 1.014 | 1.048 | 1.045 | 104.47 | 104.35 | 108.28 | 112.46 | 112.09 | 108.33 | 3.93 |  |
| 0.25 mg/mL | 1.048 | 1.049 | 1.064 | 1.053 | 1.081 | 112.46 | 112.58 | 114.43 | 113.07 | 116.52 | 113.81 | 1.70 |  |
| aCC |  | 0.982 | 0.937 | 0.946 | 0.941 | 0.927 |  |  |  |  |  |  |  |  |
| bBlank |  | 0.131 | 0.133 | 0.135 | 0.130 | 0.135 |  |  |  |  |  |  |  |  |

aCC presented the wells only containing uninfected cells.

bBlank was the wells with no cell.

cThe CC50 was calculated by the following formulas:

Distance rate = (50% − IR <50% ) / (IR >50% − IR <50%)

CC50 = 10∧{log (drug concentration with IR <50%) − distance rate × log (dilution ratio)}

**Supplementary Table S3** Raw data of the anti-EV71 activity of CYN solution tested by relative vRNA expression level

| Group | Concentration (mg/mL) | Ct value of EV71 | | | | | | Ctvalue of β-actin | | | | | | aRelative expression level of EV71 (Lg2－ΔΔCt) | |
| --- | --- | --- | --- | --- | --- | --- | --- | --- | --- | --- | --- | --- | --- | --- | --- |
| 1 | 2 | 3 | 4 | 5 | 6 | 1 | 2 | 3 | 4 | 5 | 6 | mean | SD |
| CYN | 5.00 | 18.18 | 17.89 | 18.62 | 18.31 | 17.94 | 18.58 | 14.75 | 14.22 | 14.41 | 14.88 | 13.91 | 14.59 | 2.48 | 0.10 |
| 2.50 | 15.28 | 15.02 | 15.23 | 15.60 | 15.46 | 15.56 | 14.57 | 14.45 | 14.48 | 14.25 | 14.58 | 14.67 | 3.36 | 0.08 |
| 1.25 | 12.70 | 12.70 | 12.65 | 13.43 | 13.43 | 13.56 | 14.71 | 14.52 | 14.37 | 14.78 | 14.25 | 14.57 | 4.06 | 0.14 |
| 0.63 | 11.63 | 11.98 | 11.82 | 12.43 | 12.75 | 12.62 | 14.49 | 14.79 | 15.09 | 14.65 | 14.93 | 14.79 | 4.40 | 0.14 |
| Ribavirin | 1.00 | 17.03 | 16.55 | 17.12 | 18.05 | 17.51 | 18.10 | 15.50 | 15.42 | 15.53 | 15.27 | 15.49 | 15.69 | 3.05 | 0.18 |
| VC |  | 10.97 | 11.26 | 11.38 | 12.04 | 12.14 | 12.22 | 15.18 | 15.11 | 16.05 | 15.33 | 15.22 | 15.79 | 4.76 | 0.18 |
| Base |  | 27.35 | 27.24 | 27.56 | 27.97 | 27.95 | 28.27 | 15.85 | 15.53 | 15.70 | 15.65 | 15.71 | 15.72 | 0.00 | 0.12 |

aThe relative expression level of each group was calculated with the following formulas.

ΔΔCt = (Ct value of EV71 － Ct value of β-actin)tested group － (Ct value of EV71 － Ct value of β-actin)Base**Supplementary Table S4** Raw data of anti-EV71 activity of CYN solution tested by cell viability rates

| Groups | | OD value | | | | | Inhibition rate (%) | | | | | | | aIC50 (µg/mL) |
| --- | --- | --- | --- | --- | --- | --- | --- | --- | --- | --- | --- | --- | --- | --- |
| 1 | 2 | 3 | 4 | 5 | 1 | 2 | 3 | 4 | 5 | mean | SD |
| CYN | 2.50 mg/mL | 1.4133 | 1.4331 | 1.2999 | 1.4592 | 1.4711 | 106.59 | 108.42 | 96.12 | 110.83 | 111.93 | 106.78 | 6.31 | 996.85 |
| 1.25 mg/mL | 0.9149 | 0.8026 | 0.9312 | 0.9657 | 0.9719 | 60.57 | 50.20 | 62.08 | 65.26 | 65.83 | 60.79 | 6.31 |
| 0.63 mg/mL | 0.7493 | 0.4702 | 0.4903 | 0.6457 | 0.4411 | 45.28 | 19.51 | 21.37 | 35.72 | 16.83 | 27.74 | 12.23 |
| 0.31 mg/mL | 0.3518 | 0.3977 | 0.2272 | 0.3025 | 0.3310 | 8.58 | 12.82 | -2.92 | 4.03 | 6.66 | 5.83 | 5.85 |
| 0.16 mg/mL | 0.3471 | 0.2392 | 0.1820 | 0.2802 | 0.2591 | 8.15 | -1.82 | -7.10 | 1.97 | 0.02 | 0.25 | 5.56 |
| VC |  | 0.3167 | 0.2968 | 0.1854 | 0.2174 | 0.2780 |  |  |  |  |  |  |  |  |
| CC |  | 1.3561 | 1.3243 | 1.2738 | 1.3606 | 1.3949 |  |  |  |  |  |  |  |  |

aThe IC50 was calculated by the following formulas:

Distance rate = (IR >50% − 50%) / (IR >50% − IR <50%)

IC50 = 10∧{log (drug concentration with IR >50%) − distance rate × log (dilution ratio)}

**Supplementary Table S5** Raw data of anti-EV71 activity of Ribavirin tested by cell viability rates

| Groups | | OD value | | | | | Inhibition rate (%) | | | | | | | aIC50 (µg/mL) |
| --- | --- | --- | --- | --- | --- | --- | --- | --- | --- | --- | --- | --- | --- | --- |
| 1 | 2 | 3 | 4 | 5 | 1 | 2 | 3 | 4 | 5 | mean | SD |
| Ribavirin | 1.00 mg/mL | 1.2301 | 1.0337 | 1.0905 | 1.1337 | 1.1614 | 95.65 | 78.30 | 83.32 | 87.14 | 89.58 | 86.80 | 6.53 | 289.68 |
| 0.50 mg/mL | 1.0635 | 1.1244 | 0.9843 | 0.9879 | 1.0356 | 80.94 | 86.32 | 73.94 | 74.26 | 78.47 | 78.79 | 5.13 |
| 0.25 mg/mL | 0.7282 | 0.5865 | 0.6364 | 0.6269 | 0.5485 | 51.32 | 38.80 | 43.21 | 42.37 | 35.45 | 42.23 | 5.94 |
| 0.13 mg/mL | 0.2549 | 0.2090 | 0.1569 | 0.2023 | 0.1536 | 9.51 | 5.46 | 0.86 | 4.87 | 0.57 | 4.25 | 3.70 |
| 0.06 mg/mL | 0.1940 | 0.1418 | 0.1350 | 0.1414 | 0.1681 | 4.14 | -0.48 | -1.08 | -0.51 | 1.85 | 0.78 | 2.18 |
| VC |  | 0.1675 | 0.1334 | 0.1310 | 0.1520 | 0.1520 |  |  |  |  |  |  |  |  |
| CC |  | 1.4023 | 1.2757 | 1.2665 | 1.2606 | 1.1915 |  |  |  |  |  |  |  |  |

aThe IC50 was calculated by the following formulas:

Distance rate = (IR >50% − 50%) / (IR >50% − IR <50%)

IC50 = 10∧{log (drug concentration with IR >50%) − distance rate × log (dilution ratio)}

**Supplementary Table S6** Raw data of the cytotoxicity of AEMC on RD cells

| Groups | | OD value | | | | | Cell survival rate (%) | | | | | | |
| --- | --- | --- | --- | --- | --- | --- | --- | --- | --- | --- | --- | --- | --- |
| 1 | 2 | 3 | 4 | 5 | 1 | 2 | 3 | 4 | 5 | mean | SD |
| AEMC | 40 mg/mL | 0.378 | 0.173 | 0.139 | 0.140 | 0.220 | 24.41 | 4.46 | 1.15 | 1.25 | 9.03 | 8.06 | 9.69 |
| 20 mg/mL | 0.707 | 0.900 | 1.520 | 1.158 | 0.872 | 56.42 | 75.20 | 135.54 | 100.31 | 72.48 | 87.99 | 30.88 |
| 10 mg/mL | 1.219 | 1.257 | 1.299 | 1.249 | 1.115 | 106.25 | 109.95 | 114.03 | 109.17 | 96.13 | 107.10 | 6.74 |
| 5 mg/mL | 1.020 | 1.068 | 1.095 | 1.060 | 1.038 | 86.88 | 91.55 | 94.18 | 90.77 | 88.63 | 90.40 | 2.80 |
| aCC |  | 1.209 | 1.146 | 1.144 | 1.134 | 1.141 |  |  |  |  |  |  |  |
| bBlank |  | 0.124 | 0.125 | 0.137 | 0.123 | 0.127 |  |  |  |  |  |  |  |

aCC presented the wells only containing uninfected cells.

bBlank was the wells with no cell.

**Supplementary Table S7** Raw data of the cytotoxicity of AELLF on RD cells

| Groups | | OD value | | | | | Cell survival rate (%) | | | | | | |
| --- | --- | --- | --- | --- | --- | --- | --- | --- | --- | --- | --- | --- | --- |
| 1 | 2 | 3 | 4 | 5 | 1 | 2 | 3 | 4 | 5 | mean | SD |
| AELLF | 10.0 mg/mL | 0.213 | 0.265 | 0.209 | 0.205 | 0.202 | 6.37 | 10.31 | 6.07 | 5.77 | 5.54 | 6.81 | 1.98 |
| 5.00 mg/mL | 0.791 | 0.917 | 0.884 | 0.705 | 0.861 | 50.11 | 59.65 | 57.15 | 43.61 | 55.41 | 53.19 | 6.40 |
| 2.50 mg/mL | 1.906 | 1.839 | 1.947 | 1.802 | 1.889 | 134.49 | 129.42 | 137.60 | 126.62 | 133.21 | 132.27 | 4.31 |
| 1.25 mg/mL | 1.742 | 1.729 | 1.723 | 1.712 | 1.689 | 122.08 | 121.10 | 120.64 | 119.81 | 118.07 | 120.34 | 1.51 |
| aCC |  | 1.525 | 1.448 | 1.438 | 1.444 | 1.396 |  |  |  |  |  |  |  |
| bBlank |  | 0.129 | 0.134 | 0.130 | 0.124 | 0.127 |  |  |  |  |  |  |  |

aCC presented the wells only containing uninfected cells.

bBlank was the wells with no cell.

**Supplementary Table S8** Raw data of the cytotoxicity of AEEH on RD cells

| Groups | | OD value | | | | | Cell survival rate (%) | | | | | | |
| --- | --- | --- | --- | --- | --- | --- | --- | --- | --- | --- | --- | --- | --- |
| 1 | 2 | 3 | 4 | 5 | 1 | 2 | 3 | 4 | 5 | mean | SD |
| AEEH | 10.0 mg/mL | 0.146 | 0.148 | 0.148 | 0.1550 | 0.1930 | 1.62 | 1.87 | 1.87 | 2.73 | 7.40 | 3.10 | 2.44 |
| 5.00 mg/mL | 0.206 | 0.203 | 0.248 | 0.3090 | 0.4030 | 8.99 | 8.63 | 14.16 | 21.65 | 33.20 | 17.33 | 10.32 |
| 2.50 mg/mL | 1.124 | 0.888 | 0.707 | 0.5860 | 0.5340 | 121.80 | 92.80 | 70.56 | 55.69 | 49.30 | 78.03 | 29.64 |
| 1.25 mg/mL | 1.214 | 1.251 | 1.261 | 1.1500 | 0.8070 | 132.86 | 137.40 | 138.63 | 124.99 | 82.85 | 123.35 | 23.26 |
| aCC |  | 0.982 | 0.937 | 0.946 | 0.9410 | 0.9270 |  |  |  |  |  |  |  |
| bBlank |  | 0.131 | 0.133 | 0.135 | 0.1300 | 0.1350 |  |  |  |  |  |  |  |

aCC presented the wells only containing uninfected cells.

bBlank was the wells with no cell.

**Supplementary Table S9** Raw data of the cytotoxicity of AERCC on RD cells

| Groups | | OD value | | | | | Cell survival rate (%) | | | | | | |
| --- | --- | --- | --- | --- | --- | --- | --- | --- | --- | --- | --- | --- | --- |
| 1 | 2 | 3 | 4 | 5 | 1 | 2 | 3 | 4 | 5 | mean | SD |
| AERCC | 320 mg/mL | 0.208 | 0.192 | 0.177 | 0.1820 | 0.2070 | 9.15 | 7.28 | 5.54 | 6.12 | 9.03 | 7.42 | 1.64 |
| 160 mg/mL | 0.484 | 0.643 | 0.545 | 0.3970 | 0.4310 | 41.26 | 59.76 | 48.36 | 31.14 | 35.09 | 43.12 | 11.36 |
| 80 mg/mL | 0.903 | 1.144 | 1.165 | 1.3220 | 1.1260 | 90.02 | 118.06 | 120.50 | 138.77 | 115.96 | 116.66 | 17.44 |
| 40 mg/mL | 0.925 | 0.956 | 0.975 | 0.9930 | 1.0120 | 92.58 | 96.18 | 98.39 | 100.49 | 102.70 | 98.07 | 3.91 |
| aCC |  | 1.006 | 0.976 | 0.964 | 0.9760 | 1.0220 |  |  |  |  |  |  |  |
| bBlank |  | 0.127 | 0.129 | 0.135 | 0.1240 | 0.1320 |  |  |  |  |  |  |  |

aCC presented the wells only containing uninfected cells.

bBlank was the wells with no cell.

**Supplementary Table S10** Raw data of the cytotoxicity of AEHC on RD cells

| Groups | | OD value | | | | | Cell survival rate (%) | | | | | | |
| --- | --- | --- | --- | --- | --- | --- | --- | --- | --- | --- | --- | --- | --- |
| 1 | 2 | 3 | 4 | 5 | 1 | 2 | 3 | 4 | 5 | mean | SD |
| AEHC | 40 mg/mL | 0.525 | 0.713 | 1.023 | 1.196 | 0.765 | 39.94 | 58.93 | 90.23 | 107.69 | 64.18 | 72.19 | 26.77 |
| 20 mg/mL | 1.470 | 1.505 | 1.582 | 1.569 | 1.548 | 135.36 | 138.89 | 146.67 | 145.36 | 143.24 | 141.90 | 4.70 |
| 10 mg/mL | 1.216 | 1.219 | 1.215 | 1.231 | 1.140 | 109.71 | 110.02 | 109.61 | 111.23 | 102.04 | 108.52 | 3.68 |
| 5 mg/mL | 1.168 | 1.148 | 1.140 | 1.148 | 1.140 | 104.87 | 102.85 | 102.04 | 102.85 | 102.04 | 102.93 | 1.16 |
| aCC |  | 1.090 | 1.073 | 1.141 | 1.170 | 1.125 |  |  |  |  |  |  |  |
| bBlank |  | 0.127 | 0.129 | 0.135 | 0.124 | 0.132 |  |  |  |  |  |  |  |

aCC presented the wells only containing uninfected cells.

bBlank was the wells with no cell.

**Supplementary Table S11** Raw data of the anti-EV71 activity of herbal ingredients in CYN

| Group | Concentration (mg/mL) | Ct value of EV71 | | | | | | Ctvalue of β-actin | | | | | | aRelativeEV7 RNA level (Lg2－ΔΔCt) | |
| --- | --- | --- | --- | --- | --- | --- | --- | --- | --- | --- | --- | --- | --- | --- | --- |
| 1 | 2 | 3 | 4 | 5 | 6 | 1 | 2 | 3 | 4 | 5 | 6 | mean | SD |
| AEEH | 1.25 | 15.41 | 14.61 | 14.43 | 16.29 | 16.57 | 15.40 | 14.63 | 13.74 | 13.82 | 12.15 | 11.85 | 12.00 | 4.58 | 0.56 |
| AEMC | 1.25 | 27.96 | 28.26 | 29.30 | 21.54 | 21.09 | 23.23 | 19.21 | 18.95 | 19.16 | 12.26 | 12.29 | 12.32 | 2.44 | 0.25 |
| AEHC | 1.25 | 14.19 | 13.67 | 13.22 | 15.05 | 15.44 | 14.23 | 14.33 | 14.13 | 13.37 | 12.53 | 12.55 | 12.68 | 4.99 | 0.45 |
| AELLF | 1.25 | 22.22 | 21.84 | 22.20 | 21.44 | 20.43 | 23.42 | 14.12 | 14.06 | 14.47 | 12.21 | 11.43 | 12.29 | 2.65 | 0.39 |
| AERCC | 1.25 | 13.87 | 14.04 | 12.97 | 14.63 | 14.12 | 13.49 | 14.19 | 14.18 | 13.78 | 12.51 | 12.23 | 12.39 | 5.11 | 0.37 |
| Ribavirin | 1.00 | 20.03 | 19.77 | 19.43 | 19.66 | 20.01 | 19.11 | 15.10 | 14.78 | 14.58 | 13.28 | 13.34 | 13.66 | 3.64 | 0.24 |
| VC |  | 13.72 | 13.75 | 12.10 | 13.38 | 12.72 | 12.33 | 14.20 | 14.19 | 14.57 | 13.00 | 12.63 | 12.56 | 5.46 | 0.30 |
| Base |  | 31.13 | 30.56 | 30.48 | 30.89 | 31.11 | 31.79 | 14.48 | 13.72 | 14.28 | 12.66 | 12.54 | 12.54 | 0.00 | 0.37 |

aThe relative expression level of each group was calculated with the following formulas.

ΔΔCt = (Ct value of EV71 － Ct value of β-actin)tested group － (Ct value of EV71 － Ct value of β-actin)Base

**Supplementary Table S12** Raw data of the anti-EV71 activity of AEMC tested by cell viability rates

| Groups | | OD value | | | | | Inhibition rate (%) | | | | | | | aIC50 (µg/mL) |
| --- | --- | --- | --- | --- | --- | --- | --- | --- | --- | --- | --- | --- | --- | --- |
| 1 | 2 | 3 | 4 | 5 | 1 | 2 | 3 | 4 | 5 | mean | SD |
| AEMC | 1.25 mg/mL | 1.2643 | 1.1803 | 1.1645 | 1.2266 | 1.1909 | 99.56 | 92.07 | 90.66 | 96.20 | 93.02 | 94.30 | 3.58 | 202.57 |
| 0.63 mg/mL | 1.2979 | 1.1260 | 1.2145 | 1.2941 | 1.1430 | 102.56 | 87.22 | 95.12 | 102.22 | 88.74 | 95.17 | 7.23 |
| 0.31 mg/mL | 1.5013 | 1.2271 | 1.2755 | 1.3916 | 1.3125 | 120.71 | 96.25 | 100.56 | 110.92 | 103.87 | 106.46 | 9.60 |
| 0.16 mg/mL | 0.3935 | 0.4692 | 0.2707 | 0.2873 | 0.2286 | 21.87 | 28.62 | 10.91 | 12.39 | 7.15 | 16.19 | 8.81 |
| 0.08 mg/mL | 0.1855 | 0.1682 | 0.1676 | 0.1757 | 0.1436 | 3.31 | 1.76 | 1.71 | 2.43 | -0.43 | 1.76 | 1.38 |
| VC |  | 0.1790 | 0.1415 | 0.1372 | 0.1517 | 0.1327 |  |  |  |  |  |  |  |  |
| CC |  | 1.2887 | 1.2259 | 1.2374 | 1.3069 | 1.2870 |  |  |  |  |  |  |  |  |

aThe IC50 was calculated by the following formulas:

Distance rate = (IR >50% − 50%) / (IR >50% − IR <50%)

IC50 = 10∧{log (drug concentration with IR >50%) − distance rate × log (dilution ratio)}

**Supplementary Table S13** Raw data of the anti-EV71 activity of AELLF tested by cell viability rates

| Groups | | OD value | | | | | Inhibition rate (%) | | | | | | | aIC50 (µg/mL) |
| --- | --- | --- | --- | --- | --- | --- | --- | --- | --- | --- | --- | --- | --- | --- |
| 1 | 2 | 3 | 4 | 5 | 1 | 2 | 3 | 4 | 5 | mean | SD |
| AELLF | 0.63 mg/mL | 1.2490 | 1.1917 | 1.2201 | 1.2092 | 1.1829 | 154.51 | 144.55 | 149.49 | 147.59 | 143.03 | 147.83 | 4.51 | 174.77 |
| 0.31 mg/mL | 0.9437 | 1.0421 | 0.7595 | 1.0126 | 0.8484 | 101.48 | 118.57 | 69.48 | 113.44 | 84.92 | 97.58 | 20.35 |
| 0.16 mg/mL | 0.5832 | 0.6747 | 0.5304 | 0.4762 | 0.7082 | 38.86 | 54.75 | 29.69 | 20.27 | 60.57 | 40.83 | 16.84 |
| 0.08 mg/mL | 0.2947 | 0.3128 | 0.2554 | 0.3785 | 0.3392 | -11.26 | -8.11 | -18.08 | 3.30 | -3.53 | -7.54 | 8.05 |
| 0.04 mg/mL | 0.3132 | 0.4121 | 0.2973 | 0.2743 | 0.3444 | -8.04 | 9.14 | -10.80 | -14.80 | -2.62 | -5.43 | 9.27 |
| VC |  | 0.4094 | 0.4152 | 0.3990 | 0.2644 | 0.3095 |  |  |  |  |  |  |  |  |
| CC |  | 0.9434 | 0.9171 | 1.0013 | 0.9085 | 0.9057 |  |  |  |  |  |  |  |  |

aThe IC50 was calculated by the following formulas:

Distance rate = (IR >50% − 50%) / (IR >50% − IR <50%)

IC50 = 10∧{log (drug concentration with IR >50%) − distance rate × log (dilution ratio)}

**Supplementary Table S14** Identification of chemical constituents from AEMC and AELLF by HPLC-Q-TOF-MS/MS

| **No** | **RT**  **(min)** | **Molecular formula** | **ESI-** | **m/z** | **Error** | **Compound name** | **Source** |
| --- | --- | --- | --- | --- | --- | --- | --- |
| 1 | 2.79 | C7H12O6 | [M-H]- | 191.0545 | -8.39 | quininic acid | AEMC, AELLF |
| 2 | 3.24 | C4H6O5 | [M-H]- | 133.0132 | -7.81 | malic acid | AEMC, AELLF |
| 3 | 3.41 | C7H10O5 | [M-H]- | 173.0444 | -6.59 | shikimic acid | AELLF |
| 4 | 3.73 | C14H12O11 | [M-H]- | 355.0299 | -2.20 | chebulic acid | AELLF |
| 5 | 3.78 | C6H8O7 | [M-H]- | 191.0186 | -5.86 | citric acid | AEMC, AELLF |
| 6 | 4.63 | C7H11O5N | [M-H]- | 188.0546 | -9.76 | N-acetyl-DL-glutamic acid | AEMC, AELLF |
| 7 | 5.36 | C13H16O10 | [M-H]- | 331.0643 | -8.34 | 6-O-galloylglucose | AELLF |
| 8 | 7.15/27.30 | C16H18O8 | [M-H]- | 337.0902 | -7.96 | 3-O-Coumaroylquinic acid | AELLF |
| 9 | 8.30 | C7H6O5 | [M-H]- | 169.0132 | -6.16 | gallic acid | AEMC, AELLF |
| 10 | 9.52 | C13H16O9 | [M-H]- | 315.0701 | -6.50 | hydroxybenzoic acid-glucoside | AEMC, AELLF |
| 11 | 10.63 | C13H16O10 | [M-H]- | 331.0633 | -11.35 | 1-O-galloylglucose | AELLF |
| 12 | 13.03 | C9H10O5 | [M-H]- | 197.0436 | -9.83 | vanillylmandelic Acid | AEMC |
| 13 | 13.17 | C13H14O10 | [M-H]- | 329.0493 | -6.42 | dihydroxybenzoic acid glucuronide | AEMC |
| 14 | 15.43 | C7H6O4 | [M-H]- | 153.0172 | -13.84 | protocatechuic acid | AEMC, AELLF |
| 15 | 15.94 | C13H12O8 | [M-H]- | 295.0448 | -3.85 | phaseolic acid | AEMC |
| 16 | 16.51 | C14H18O8 | [M-H]- | 313.0545 | -6.39 | (3,4,5-trihydroxy-6-phenoxy-tetrahydro-pyran-2-ylmethoxy)-acetic acid | AEMC |
| 17 | 18.91 | C16H18O9 | [M-H]- | 353.0871 | -1.99 | neochlorogenic acid | AELLF |
| 18 | 22.55 | C22H34O12 | [M+CH3COOH-H]- | 549.2165 | -4.86 | everiastoside K | AEMC |
| 19 | 30.92 | C16H18O9 | [M-H]- | 353.0865 | -3.69 | chlorogenic acid | AELLF |
| 20 | 34.09 | C15H18O9 | [M-H]- | 341.0867 | -3.23 | caffeic acid 3-glucoside | AEMC |
| 21 | 34.45 | C8H8O4 | [M-H]- | 167.0341 | -5.25 | vanillic acid | AEMC, AELLF |
| 22 | 34.97 | C16H18O9 | [M-H]- | 353.0857 | -5.95 | cryptochlorogenic acid | AELLF |
| 23 | 36.12 | C9H8O4 | [M-H]- | 179.0334 | -8.79 | caffeic acid | AEMC |
| 24 | 37.61 | C14H17NO6 | [M+CH3COOH-H]- | 354.1175 | -6.60 | sambunigrin | AEMC |
| 25 | 39.69 | C16H18O8 | [M-H]- | 337.0902 | -7.96 | 4-O-coumaroylquinic acid | AELLF |
| 26 | 40.31 | C13H14O9 | [M-H]- | 313.0545 | -6.39 | norbergenin | AEMC |
| 27 | 41.62 | C16H18O8 | [M-H]- | 337.0913 | -4.71 | 1-coumaroylquinic Acid | AELLF |
| 28 | 47.29 | C27H30O15 | [M-H]- | 593.1495 | -2.85 | vicenin | AEMC |
| 29 | 48.07 | C10H8O4 | [M-H]- | 191.0321 | -15.01 | scopoletin | AELLF |
| 30 | 49.49 | C12H8O6 | [M-H]- | 247.0225 | -9.32 | 7-acetoxycoumarin-3-carboxylic acid | AELLF |
| 31 | 49.54 | C28H24O17 | [M-H]- | 631.0902 | -6.13 | myricetin-3-(2'-gallacylgalactoside) | AELLF |
| 32 | 54.13 | C21H20O13 | [M-H]- | 479.0813 | -3.78 | myricetin 3-O-galactoside | AELLF |
| 33 | 56.16 | C28H24O16 | [M-H]- | 615.0960 | -5.13 | quercetin 3-O-(6’’-galloyl)-β-D-glucopyranoside | AELLF |
| 34 | 56.21 | C24H26O13 | [M-H]- | 521.1299 | -0.31 | salviaflaside | AEMC |
| 35 | 59.14 | C21H20O12 | [M-H]- | 463.0846 | -7.76 | hyperoside | AELLF |
| 36 | 59.88 | C21H20O12 | [M-H]- | 463.0846 | -7.76 | isoquercitrin | AELLF |
| 37 | 60.35 | C27H30O16 | [M-H]- | 609.1435 | -4.28 | rutin | AEMC, AELLF |
| 38 | 60.43 | C18H16O8 | [M-H]- | 359.0756 | -4.56 | rosmarinic acid | AEMC |
| 39 | 62.23 | C14H6O8 | [M-H]- | 300.9967 | -7.59 | ellagic acid | AEMC, AELLF |
| 40 | 62.51 | C28H24O15 | [M-H]- | 599.1024 | -3.07 | kaempferol 3-O-(6''-galloyl)-beta-D-glucopyranoside | AELLF |
| 41 | 64.47 | C40H28O26 | [M-2H]2- | 461.0713 | -2.70 | euphormisin M2 | AELLF |
| 42 | 65.22 | C21H20O11 | [M-H]- | 447.0909 | -5.32 | astragalin | AEMC, AELLF |
| 43 | 66.02 | C27H30O15 | [M-H]- | 593.1480 | -5.38 | nicotilorin | AELLF |
| 44 | 67.10 | C28H32O16 | [M-H]- | 623.1563 | -8.75 | isorhamnetin 3-glucoside-7-rhamnoside | AELLF |

**Supplementary Table S15** Raw data of the cytotoxicity of rosmarinic acid

| Groups | | OD value | | | | | Cell survival rate (%) | | | | | | |
| --- | --- | --- | --- | --- | --- | --- | --- | --- | --- | --- | --- | --- | --- |
| 1 | 2 | 3 | 4 | 5 | 1 | 2 | 3 | 4 | 5 | mean | SD |
| rosmarinic acid | 100 µg/mL | 0.873 | 1.054 | 1.089 | 1.034 | 1.098 | 70.73 | 87.97 | 91.31 | 86.07 | 92.17 | 85.65 | 8.70 |
| 50 µg/mL | 1.154 | 1.201 | 1.183 | 1.123 | 1.186 | 97.50 | 101.98 | 100.27 | 94.55 | 100.55 | 98.97 | 2.96 |
| 25.0 µg/mL | 1.126 | 1.176 | 1.164 | 1.125 | 1.206 | 94.84 | 99.60 | 98.46 | 94.74 | 102.46 | 98.02 | 3.29 |
| 12.5 µg/mL | 1.045 | 1.076 | 1.125 | 1.142 | 1.23 | 87.12 | 90.07 | 94.74 | 96.36 | 104.75 | 94.61 | 6.76 |
| aCC |  | 1.193 | 1.148 | 1.161 | 1.167 | 1.232 |  |  |  |  |  |  |  |
| bBlank |  | 0.125 | 0.131 | 0.139 | 0.127 | 0.132 |  |  |  |  |  |  |  |

aCC presented the wells only containing uninfected cells.

bBlank was the wells with no cell.

**Supplementary Table S16** Raw data of the cytotoxicity of caffeic acid

| Groups | | OD value | | | | | Cell survival rate (%) | | | | | | |
| --- | --- | --- | --- | --- | --- | --- | --- | --- | --- | --- | --- | --- | --- |
| 1 | 2 | 3 | 4 | 5 | 1 | 2 | 3 | 4 | 5 | mean | SD |
| caffeic acid | 100 µg/mL | 0.152 | 0.138 | 0.136 | 0.145 | 0.15 | 2.56 | 1.12 | 0.91 | 1.84 | 2.36 | 1.76 | 0.73 |
| 50 µg/mL | 1.835 | 1.741 | 1.754 | 1.733 | 1.834 | 176.54 | 166.82 | 168.16 | 165.99 | 176.43 | 170.79 | 5.26 |
| 25.0 µg/mL | 1.651 | 1.513 | 1.484 | 1.638 | 1.678 | 157.51 | 143.25 | 140.25 | 156.17 | 160.31 | 151.50 | 9.08 |
| 12.5 µg/mL | 1.204 | 1.094 | 1.143 | 1.117 | 1.191 | 111.31 | 99.94 | 105.00 | 102.32 | 109.96 | 105.71 | 4.87 |
| aCC |  | 1.064 | 1.053 | 1.09 | 1.114 | 1.152 |  |  |  |  |  |  |  |
| bBlank |  | 0.124 | 0.125 | 0.137 | 0.123 | 0.127 |  |  |  |  |  |  |  |

aCC presented the wells only containing uninfected cells.

bBlank was the wells with no cell.

**Supplementary Table S17** Raw data of the cytotoxicity of gallic acid

| Groups | | OD value | | | | | Cell survival rate (%) | | | | | | |
| --- | --- | --- | --- | --- | --- | --- | --- | --- | --- | --- | --- | --- | --- |
| 1 | 2 | 3 | 4 | 5 | 1 | 2 | 3 | 4 | 5 | mean | SD |
| gallic acid | 25.0 µg/mL | 0.491 | 0.48 | 0.468 | 0.423 | 0.444 | 41.20 | 39.96 | 38.62 | 33.56 | 35.92 | 37.85 | 3.10 |
| 12.5 µg/mL | 0.772 | 0.797 | 1.021 | 0.919 | 0.872 | 72.78 | 75.59 | 100.76 | 89.30 | 84.02 | 84.49 | 11.23 |
| 6.25 µg/mL | 1.234 | 1.226 | 1.23 | 1.118 | 1.076 | 124.70 | 123.80 | 124.25 | 111.67 | 106.95 | 118.27 | 8.36 |
| 3.13 µg/mL | 0.973 | 1.016 | 1.019 | 0.986 | 1.06 | 41.20 | 39.96 | 38.62 | 33.56 | 35.92 | 37.85 | 3.10 |
| aCC |  | 0.993 | 1.023 | 0.987 | 1.055 | 1.013 |  |  |  |  |  |  |  |
| bBlank |  | 0.123 | 0.124 | 0.13 | 0.119 | 0.126 |  |  |  |  |  |  |  |

aCC presented the wells only containing uninfected cells.

bBlank was the wells with no cell.

**Supplementary Table S18** Raw data of the cytotoxicity of hyperoside

| Groups | | OD value | | | | | Cell survival rate (%) | | | | | | |
| --- | --- | --- | --- | --- | --- | --- | --- | --- | --- | --- | --- | --- | --- |
| 1 | 2 | 3 | 4 | 5 | 1 | 2 | 3 | 4 | 5 | mean | SD |
| hyperoside | 400 µg/mL | 0.228 | 0.217 | 0.240 | 0.209 | 0.230 | 10.17 | 9.09 | 11.35 | 8.31 | 10.37 | 9.86 | 1.18 |
| 200 µg/mL | 1.289 | 1.470 | 1.295 | 1.231 | 1.336 | 114.36 | 132.13 | 114.95 | 108.66 | 118.97 | 117.81 | 8.81 |
| 100 µg/mL | 1.345 | 1.210 | 1.230 | 1.346 | 1.348 | 119.85 | 106.60 | 108.56 | 119.95 | 120.15 | 115.02 | 6.83 |
| 50 µg/mL | 1.349 | 1.334 | 1.322 | 1.191 | 1.233 | 120.25 | 118.77 | 117.60 | 104.73 | 108.86 | 114.04 | 6.84 |
| aCC |  | 1.100 | 1.104 | 1.092 | 1.229 | 1.189 |  |  |  |  |  |  |  |
| bBlank |  | 0.123 | 0.124 | 0.130 | 0.119 | 0.126 |  |  |  |  |  |  |  |

aCC presented the wells only containing uninfected cells.

bBlank was the wells with no cell.

**Supplementary Table S19** Raw data of the cytotoxicity of rutin

| Groups | | OD value | | | | | Cell survival rate (%) | | | | | | |
| --- | --- | --- | --- | --- | --- | --- | --- | --- | --- | --- | --- | --- | --- |
| 1 | 2 | 3 | 4 | 5 | 1 | 2 | 3 | 4 | 5 | mean | SD |
| rutin | 400 µg/mL | 0.575 | 0.564 | 0.524 | 0.511 | 0.462 | 45.25 | 44.18 | 40.29 | 39.03 | 34.26 | 40.60 | 4.39 |
| 200 µg/mL | 1.488 | 1.449 | 1.502 | 1.490 | 1.341 | 134.07 | 130.27 | 135.43 | 134.26 | 119.77 | 130.76 | 6.44 |
| 100 µg/mL | 1.160 | 1.098 | 1.088 | 1.104 | 1.106 | 102.16 | 96.13 | 95.16 | 96.71 | 96.91 | 97.41 | 2.74 |
| 50 µg/mL | 1.126 | 1.143 | 1.125 | 1.156 | 1.104 | 98.85 | 100.51 | 98.75 | 101.77 | 96.71 | 99.32 | 1.92 |
| aCC |  | 1.095 | 1.099 | 1.089 | 1.197 | 1.209 |  |  |  |  |  |  |  |
| bBlank |  | 0.104 | 0.117 | 0.103 | 0.107 | 0.118 |  |  |  |  |  |  |  |

aCC presented the wells only containing uninfected cells.

bBlank was the wells with no cell.

**Supplementary Table S20** Raw data of the cytotoxicity of astragalin

| Groups | | OD value | | | | | Cell survival rate (%) | | | | | | |
| --- | --- | --- | --- | --- | --- | --- | --- | --- | --- | --- | --- | --- | --- |
| 1 | 2 | 3 | 4 | 5 | 1 | 2 | 3 | 4 | 5 | mean | SD |
| astragalin | 400 µg/mL | 0.464 | 0.371 | 0.434 | 0.458 | 0.393 | 31.48 | 22.73 | 28.66 | 30.92 | 24.80 | 27.72 | 3.83 |
| 200 µg/mL | 1.437 | 1.450 | 1.461 | 1.473 | 1.532 | 123.03 | 124.26 | 125.29 | 126.42 | 131.97 | 126.19 | 3.46 |
| 100 µg/mL | 1.306 | 1.277 | 1.307 | 1.317 | 1.290 | 110.71 | 107.98 | 110.80 | 111.74 | 109.20 | 110.09 | 1.49 |
| 50 µg/mL | 1.085 | 1.222 | 1.318 | 1.292 | 1.252 | 89.91 | 102.80 | 111.84 | 109.39 | 105.63 | 103.91 | 8.56 |
| aCC |  | 1.206 | 1.187 | 1.235 | 1.191 | 1.142 |  |  |  |  |  |  |  |
| bBlank |  | 0.130 | 0.126 | 0.140 | 0.124 | 0.127 |  |  |  |  |  |  |  |

aCC presented the wells only containing uninfected cells.

bBlank was the wells with no cell.

**Supplementary Table S21** Raw data of the cytotoxicity of chlorgenic acid

| Groups | | OD value | | | | | Cell survival rate (%) | | | | | | |
| --- | --- | --- | --- | --- | --- | --- | --- | --- | --- | --- | --- | --- | --- |
| 1 | 2 | 3 | 4 | 5 | 1 | 2 | 3 | 4 | 5 | mean | SD |
| chlorgenic acid | 200 µg/mL | 0.168 | 0.15 | 0.149 | 0.156 | 0.159 | 3.99 | 2.38 | 2.30 | 2.92 | 3.19 | 2.95 | 0.69 |
| 100 µg/mL | 1.504 | 1.504 | 1.451 | 1.394 | 1.338 | 122.85 | 122.85 | 118.13 | 113.06 | 108.08 | 116.99 | 6.42 |
| 50 µg/mL | 1.479 | 1.453 | 1.526 | 1.405 | 1.486 | 120.62 | 118.31 | 124.80 | 114.04 | 121.25 | 119.80 | 3.98 |
| 25 µg/mL | 1.174 | 1.162 | 1.206 | 1.25 | 1.207 | 93.49 | 92.42 | 96.33 | 100.25 | 96.42 | 95.78 | 3.05 |
| aCC |  | 1.239 | 1.241 | 1.248 | 1.25 | 1.258 |  |  |  |  |  |  |  |
| bBlank |  | 0.124 | 0.121 | 0.132 | 0.12 | 0.119 |  |  |  |  |  |  |  |

aCC presented the wells only containing uninfected cells.

bBlank was the wells with no cell.

**Supplementary Table S22** Raw data of the cytotoxicity of cryptochlorogenic acid

| Groups | | OD value | | | | | Cell survival rate (%) | | | | | | |
| --- | --- | --- | --- | --- | --- | --- | --- | --- | --- | --- | --- | --- | --- |
| 1 | 2 | 3 | 4 | 5 | 1 | 2 | 3 | 4 | 5 | mean | SD |
| cryptochlorogenic acid | 200 µg/mL | 0.308 | 0.288 | 0.298 | 0.285 | 0.311 | 19.96 | 17.82 | 18.89 | 17.50 | 20.28 | 18.89 | 1.24 |
| 100 µg/mL | 1.359 | 1.236 | 1.251 | 1.177 | 1.146 | 132.24 | 119.10 | 120.71 | 112.80 | 109.49 | 118.87 | 8.76 |
| 50 µg/mL | 1.23 | 1.202 | 1.126 | 1.014 | 1.046 | 118.46 | 115.47 | 107.35 | 95.38 | 98.80 | 107.09 | 10.07 |
| 25 µg/mL | 1.097 | 1.083 | 1.031 | 0.953 | 0.954 | 104.25 | 102.76 | 97.20 | 88.87 | 88.97 | 96.41 | 7.32 |
| aCC |  | 1.032 | 1.07 | 1.086 | 1.048 | 1.05 |  |  |  |  |  |  |  |
| bBlank |  | 0.121 | 0.118 | 0.125 | 0.121 | 0.121 |  |  |  |  |  |  |  |

aCC presented the wells only containing uninfected cells.

bBlank was the wells with no cell.

**Supplementary Table S23** Raw data of the cytotoxicity of neochlorogenic acid on RD cells

| Groups | | OD value | | | | | Cell survival rate (%) | | | | | | |
| --- | --- | --- | --- | --- | --- | --- | --- | --- | --- | --- | --- | --- | --- |
| 1 | 2 | 3 | 4 | 5 | 1 | 2 | 3 | 4 | 5 | mean | SD |
| neochlorogenic acid | 200 µg/mL | 0.278 | 0.259 | 0.303 | 0.25 | 0.255 | 16.75 | 14.72 | 19.42 | 13.76 | 14.29 | 15.79 | 2.32 |
| 100 µg/mL | 1.413 | 1.356 | 1.336 | 1.225 | 1.269 | 138.01 | 131.92 | 129.79 | 117.93 | 122.63 | 128.06 | 7.89 |
| 50 µg/mL | 1.238 | 1.211 | 1.231 | 1.147 | 1.181 | 119.32 | 116.43 | 118.57 | 109.59 | 113.23 | 115.43 | 4.03 |
| 25 µg/mL | 1.149 | 1.108 | 1.126 | 1.122 | 1.118 | 109.81 | 105.43 | 107.35 | 106.92 | 106.50 | 107.20 | 1.62 |
| aCC |  | 1.032 | 1.07 | 1.086 | 1.048 | 1.05 |  |  |  |  |  |  |  |
| bBlank |  | 0.121 | 0.118 | 0.125 | 0.121 | 0.121 |  |  |  |  |  |  |  |

aCC presented the wells only containing uninfected cells.

bBlank was the wells with no cell.

**Supplementary Table S24** Raw data of the anti-EV71 activity of nine components tested by relative vRNA expression level

| Group |  | Ct value of EV71 | | | | | | Ctvalue of β-actin | | | | | | aRelative EV71 RNA level (Lg2－ΔΔCt) | |
| --- | --- | --- | --- | --- | --- | --- | --- | --- | --- | --- | --- | --- | --- | --- | --- |
| 1 | 2 | 3 | 4 | 5 | 6 | 1 | 2 | 3 | 4 | 5 | 6 | mean | SD |
| neochlorogenic acid | 100 μg/mL | 10.12 | 9.79 | 9.96 | 11.29 | 11.20 | 11.88 | 13.04 | 12.85 | 13.02 | 17.31 | 17.46 | 17.38 | 5.09 | 0.49 |
| rutin | 200 μg/mL | 10.22 | 10.25 | 10.16 | 12.08 | 11.56 | 11.56 | 14.23 | 14.12 | 14.39 | 17.36 | 17.39 | 17.30 | 5.20 | 0.27 |
| astragalin | 200 μg/mL | 10.09 | 10.51 | 10.14 | 11.01 | 11.49 | 12.30 | 14.04 | 14.10 | 13.93 | 16.61 | 17.75 | 17.51 | 4.85 | 0.79 |
| rosmarinic acid | 50 μg/mL | 17.52 | 17.29 | 16.74 | 18.56 | 19.01 | 18.96 | 11.07 | 11.09 | 11.06 | 15.29 | 15.32 | 15.13 | 2.27 | 0.42 |
| caffeic acid | 50 μg/mL | 11.03 | 11.08 | 11.03 | 12.74 | 12.27 | 12.44 | 13.45 | 13.30 | 13.12 | 17.87 | 17.65 | 16.19 | 4.80 | 0.45 |
| cryptochlorogenic acid | 100 μg/mL | 9.91 | 10.29 | 16.20 | 10.78 | 10.73 | 12.11 | 12.82 | 13.02 | 12.96 | 16.87 | 15.90 | 16.19 | 4.63 | 0.99 |
| chlorgenic acid | 100 μg/mL | 10.34 | 9.90 | 10.00 | 13.11 | 12.84 | 12.16 | 13.24 | 13.13 | 13.22 | 18.13 | 17.96 | 18.19 | 5.02 | 0.39 |
| hyperoside | 200 μg/mL | 11.27 | 11.41 | 11.81 | 14.01 | 14.19 | 13.98 | 14.01 | 14.11 | 14.22 | 17.88 | 18.06 | 17.99 | 4.73 | 0.22 |
| gallic acid | 6.25 μg/mL | 10.36 | 10.95 | 10.17 | 11.60 | 11.94 | 12.27 | 13.08 | 13.22 | 13.23 | 16.50 | 17.81 | 14.63 | 4.81 | 0.45 |
| ribavirin | 1.00 mg/mL | 16.00 | 18.78 | 16.20 | 18.19 | 18.61 | 18.39 | 15.26 | 16.78 | 15.61 | 19.40 | 19.28 | 19.09 | 3.71 | 0.36 |
| VC |  | 10.64 | 10.97 | 10.81 | 10.51 | 10.25 | 11.36 | 13.84 | 13.59 | 13.39 | 16.96 | 16.36 | 17.42 | 5.10 | 0.57 |
| Base |  | 29.21 | 27.25 | 27.73 | 29.83 | 29.78 | 29.30 | 15.35 | 15.20 | 15.29 | 15.22 | 18.72 | 18.69 | 0.00 | 0.47 |

aThe relative expression level of each group was calculated with the following formulas.

ΔΔCt = (Ct value of EV71 － Ct value of β-actin)tested group － (Ct value of EV71 － Ct value of β-actin)Base

**Supplementary Table S25** Raw data of the anti-EV71 activity of rosmarinic acid tested by cell viability rates

| Groups | | OD value | | | | | Inhibition rate (%) | | | | | | | aIC50 (μg/mL) |
| --- | --- | --- | --- | --- | --- | --- | --- | --- | --- | --- | --- | --- | --- | --- |
| 1 | 2 | 3 | 4 | 5 | 1 | 2 | 3 | 4 | 5 | mean | SD |
| rosmarinic acid | 50.0 μg/mL | 1.2158 | 1.2034 | 1.2255 | 1.1841 | 1.2416 | 120.03 | 118.54 | 121.19 | 116.23 | 123.12 | 119.82 | 2.61 | 11.90 |
| 25.0 μg/mL | 0.9722 | 0.9781 | 1.0074 | 1.1219 | 1.1250 | 90.87 | 91.58 | 95.08 | 108.79 | 109.16 | 99.10 | 9.16 |
| 12.5 μg/mL | 0.3807 | 0.5496 | 0.7527 | 0.7974 | 0.8201 | 20.06 | 40.28 | 64.59 | 69.94 | 72.66 | 53.51 | 22.66 |
| 6.25 μg/mL | 0.2306 | 0.2115 | 0.1541 | 0.3604 | 0.2931 | 2.10 | -0.19 | -7.06 | 17.63 | 9.58 | 4.41 | 9.48 |
| 3.13 μg/mL | 0.2229 | 0.2408 | 0.1392 | 0.1752 | 0.1500 | 1.18 | 3.32 | -8.84 | -4.53 | -7.55 | -3.29 | 5.34 |
| VC |  | 0.1685 | 0.2122 | 0.2453 | 0.1944 | 0.2450 |  |  |  |  |  |  |  |  |
| CC |  | 0.9185 | 0.9272 | 0.8965 | 0.9172 | 0.8822 |  |  |  |  |  |  |  |  |

aThe IC50 was calculated by the following formulas:

Distance rate = (IR >50% − 50%) / (IR >50% − IR <50%)

IC50 = 10∧{log (drug concentration with IR >50%) − distance rate × log (dilution ratio)}
